# Supplementary material for: MOGAT: A Multi-Omics Integration Framework Using Graph Attention Networks for Cancer Subtype Prediction
Source: MDPI journal article supplement (doi:10.3390/ijms25052788), 2024-02-28
Supplement: s1 [file s1]

Supplementary Material S3: Coexpression Features Extraction Using WGCNA

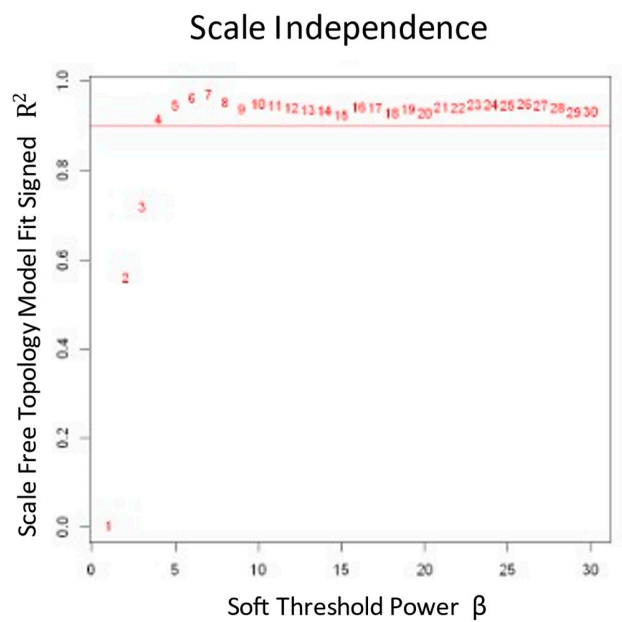

**Figure S1:** Scale Free Topology Model Fit  $R^2$  Vs Soft Threshold  $\beta$  for TCGA-BRCA.

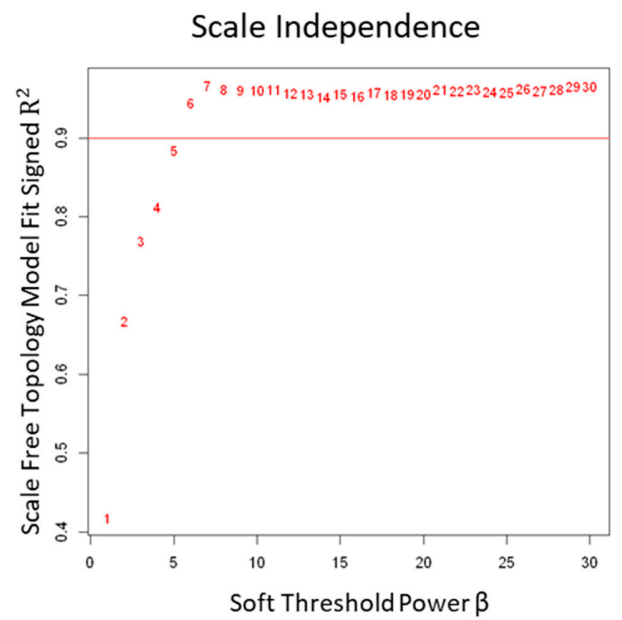

**Figure S2:** Scale Free Topology Model Fit  $R^2$  Vs Soft Threshold  $\beta$  for METABRIC.

**Table S1:** Size of the modules in terms of number of genes for TCGA-BRCA.

| Module Index | # of Genes | Module Index | # of Genes |
|--------------|------------|--------------|------------|
| 0            | 5581       | 20           | 114        |
| 1            | 2244       | 21           | 113        |
| 2            | 1640       | 22           | 109        |
| 3            | 1483       | 23           | 105        |
| 4            | 1444       | 24           | 101        |
| 5            | 1066       | 25           | 98         |
| 6            | 939        | 26           | 91         |
| 7            | 928        | 27           | 85         |
| 8            | 709        | 28           | 83         |
| 9            | 336        | 29           | 82         |
| 10           | 317        | 30           | 80         |
| 11           | 261        | 31           | 75         |
| 12           | 257        | 32           | 70         |
| 13           | 251        | 33           | 64         |
| 14           | 197        | 34           | 63         |
| 15           | 187        | 35           | 62         |
| 16           | 144        | 36           | 59         |
| 17           | 139        | 37           | 53         |
| 18           | 122        | 38           | 52         |
| 19           | 116        | 39           | 42         |

**Table S2:** Size of the modules in terms of number of genes for METABRIC.

| Module Index | # of Genes |
|--------------|------------|--------------|------------|--------------|------------|--------------|------------|--------------|------------|--------------|------------|--------------|------------|
| 0            | 10278      | 7            | 454        | 14           | 101        | 21           | 60         | 28           | 35         | 35           | 21         | 42           | 16         |
| 1            | 3124       | 8            | 413        | 15           | 87         | 22           | 54         | 29           | 35         | 36           | 21         | 43           | 16         |
| 2            | 1241       | 9            | 263        | 16           | 85         | 23           | 54         | 30           | 33         | 37           | 18         | 44           | 15         |
| 3            | 1025       | 10           | 203        | 17           | 69         | 24           | 53         | 31           | 30         | 38           | 18         | 45           | 14         |
| 4            | 740        | 11           | 165        | 18           | 69         | 25           | 52         | 32           | 25         | 39           | 17         | 46           | 13         |
| 5            | 632        | 12           | 134        | 19           | 67         | 26           | 42         | 33           | 24         | 40           | 17         | 47           | 12         |
| 6            | 497        | 13           | 108        | 20           | 63         | 27           | 38         | 34           | 24         | 41           | 17         | 48           | 11         |
