# Supplementary material for: MOGAT: A Multi-Omics Integration Framework Using Graph Attention Networks for Cancer Subtype Prediction
Source: MDPI journal article supplement (doi:10.3390/ijms25052788), 2024-02-28
Supplement: s1 [file s1]

## Supplementary Material S1: Clinical Features Preprocessing

**Table S1:** Clinical Features of TCGA-BRCA after the one-hot vector conversion. For example. Menopause has four statuses- Indeterminate, Peri, Post, and Pre, which became binary variables after one-hot vector conversion. Each variable except the last row, age, is categorical. In total, there are 31 clinical features. Gower Metric was used to construct the patient similarity network for this dataset.

| Clinical Features of TCGA-BRCA                                                                                |
|---------------------------------------------------------------------------------------------------------------|
| menopause_status_Indeterminate (neither Pre or Postmenopausal)                                                |
| menopause_status_Peri (6-12 months since last menstrual period)                                               |
| menopause_status_Post (prior bilateral ovariectomy OR >12 mo since LMP with no prior hysterectomy)            |
| menopause_status_Pre (<6 months since LMP AND no prior bilateral ovariectomy AND not on estrogen replacement) |
| race.demographic_american indian or alaska native                                                             |
| race.demographic_asian                                                                                        |
| race.demographic_black or african american                                                                    |
| race.demographic_not reported                                                                                 |
| race.demographic_white                                                                                        |
| tumor_stage.diagnoses_not reported                                                                            |
| tumor_stage.diagnoses_stage i                                                                                 |
| tumor_stage.diagnoses_stage ia                                                                                |
| tumor_stage.diagnoses_stage ib                                                                                |
| tumor_stage.diagnoses_stage ii                                                                                |
| tumor_stage.diagnoses_stage iia                                                                               |
| tumor_stage.diagnoses_stage iib                                                                               |
| tumor_stage.diagnoses_stage iii                                                                               |
| tumor_stage.diagnoses_stage iiia                                                                              |
| tumor_stage.diagnoses_stage iiib                                                                              |
| tumor_stage.diagnoses_stage iiic                                                                              |
| tumor_stage.diagnoses_stage iv                                                                                |
| tumor_stage.diagnoses_stage x                                                                                 |
| metastatic_breast_carcinoma_estrogen_receptor_status_Negative                                                 |
| metastatic_breast_carcinoma_estrogen_receptor_status_Positive                                                 |
| metastatic_breast_carcinoma_progesterone_receptor_status_Negative                                             |
| metastatic_breast_carcinoma_progesterone_receptor_status_Positive                                             |
| metastatic_breast_carcinoma_lab_proc_her2_neu_immunohistochemistry_receptor_status_Equivocal                  |
| metastatic_breast_carcinoma_lab_proc_her2_neu_immunohistochemistry_receptor_status_Negative                   |
| person_neoplasm_cancer_status_TUMOR FREE                                                                      |
| person_neoplasm_cancer_status_WITH TUMOR                                                                      |
| age_at_initial_pathologic_diagnosis                                                                           |

**Table S2:** Clinical Features of METABRIC after the one-hot vector conversion. There are 14 clinical features. Each variable except age is categorical. Gower Metric was used to construct the patient similarity network for this dataset.

| Clinical Features               |
|---------------------------------|
| age                             |
| menopausal_status_inferred_post |
| menopausal_status_inferred_pre  |
| ER.Expr_+                       |
| ER.Expr_-                       |
| Her2.Expr_+                     |
| Her2.Expr_-                     |
| PR.Expr_+                       |
| PR.Expr_-                       |
| Ethnicity.Call_African/European |
| Ethnicity.Call_Asian            |
| Ethnicity.Call_European         |
| Ethnicity.Call_European/Asian   |
| Ethnicity.Call_OddCluster       |
