# Supplementary material for: MOGAT: A Multi-Omics Integration Framework Using Graph Attention Networks for Cancer Subtype Prediction
Source: Int J Mol Sci. 2024 Feb 28;25(5):2788. doi: 10.3390/ijms25052788 (PMC10932030; doi:10.3390/ijms25052788)
Supplement: Supplementary file 1 [file ijms-25-02788-s001.zip]

Archive with 5 entries (5 files):
- Supplementary Material S1_Clinical Features Preprocessing.pdf
- Supplementary Material S2_Copy Number Alteration Data Preprocessing.pdf
- Supplementary Material S3_Coexpression Features Extraction.pdf
- Supplementary Material S4_Eigengene_TCGA-BRCA.csv
- Supplementary Material S5_Eigengene_METABRIC.csv
