# Supplementary material for: MOGAT: A Multi-Omics Integration Framework Using Graph Attention Networks for Cancer Subtype Prediction
Source: Int J Mol Sci. 2024 Feb 28;25(5):2788. doi: 10.3390/ijms25052788 (PMC10932030; doi:10.3390/ijms25052788)
Supplement: Supplementary file 1 [file ijms-25-02788-s001.zip › Supplementary Material S4_Eigengene_TCGA-BRCA.csv]

	TCGA-3C-AAAU	TCGA-3C-AALI	TCGA-3C-AALJ	TCGA-3C-AALK	TCGA-4H-AAAK	TCGA-5L-AAT0	TCGA-5T-A9QA	TCGA-A1-A0SB	TCGA-A1-A0SD	TCGA-A1-A0SE	TCGA-A1-A0SF	TCGA-A1-A0SG	TCGA-A1-A0SH	TCGA-A1-A0SI	TCGA-A1-A0SJ	TCGA-A1-A0SK	TCGA-A1-A0SM	TCGA-A1-A0SN	TCGA-A1-A0SO	TCGA-A1-A0SP	TCGA-A1-A0SQ	TCGA-A2-A04N	TCGA-A2-A04P	TCGA-A2-A04Q	TCGA-A2-A04R	TCGA-A2-A04T	TCGA-A2-A04U	TCGA-A2-A04V	TCGA-A2-A04W	TCGA-A2-A04X	TCGA-A2-A04Y	TCGA-A2-A0CK	TCGA-A2-A0CL	TCGA-A2-A0CM	TCGA-A2-A0CO	TCGA-A2-A0CP	TCGA-A2-A0CQ	TCGA-A2-A0CR	TCGA-A2-A0CS	TCGA-A2-A0CT	TCGA-A2-A0CU	TCGA-A2-A0CV	TCGA-A2-A0CW	TCGA-A2-A0CX	TCGA-A2-A0CY	TCGA-A2-A0CZ	TCGA-A2-A0D0	TCGA-A2-A0D1	TCGA-A2-A0D2
ME0	2.75E-06	-3.72E-07	9.36E-06	5.70E-07	2.15E-07	-8.14E-06	3.97E-06	9.72E-07	-7.12E-06	-3.20E-06	-2.29E-06	-1.21E-05	5.65E-06	5.59E-06	2.49E-06	1.18E-06	3.19E-06	1.43E-06	-6.33E-06	-1.28E-06	2.36E-05	-1.20E-06	4.83E-06	-1.57E-06	-4.30E-06	4.08E-05	-2.88E-06	-2.54E-06	2.22E-06	-4.07E-06	6.45E-05	1.32E-06	1.36E-06	9.16E-06	2.72E-06	1.72E-05	1.32E-05	1.08E-05	-4.64E-06	2.18E-05	2.65E-06	6.66E-06	-6.61E-07	1.02E-05	-1.24E-05	-6.04E-06	2.80E-06	-3.52E-06	2.15E-06
ME1	0.000610466	0.007037588	-0.005547846	0.005965112	-0.020226729	-0.009777739	0.004641247	-0.03612803	-0.0435566	-0.00706938	0.016381687	-0.028296605	0.03495714	0.021890492	-0.010217553	0.054912428	-0.013281562	0.033064955	-0.00438879	0.003127758	0.002729278	0.00231439	0.021534944	-0.021332689	0.017944216	0.024240171	0.008190362	-0.016842222	-0.01064749	-0.014197972	-0.022873419	0.020924507	0.004238993	-0.003899751	0.004202386	-0.042952108	0.021486606	0.008174853	-0.015956794	-0.002563887	0.017605514	0.049136613	-0.018166324	0.132849734	-0.058758613	0.002788101	-0.006715421	-0.02520939	0.009723567
ME2	-0.008880521	-0.008675365	-0.017807333	0.013531573	0.007458414	-0.00508204	-0.012686851	-0.002163396	7.72E-05	-0.018316494	-0.023861306	0.030356677	-0.015080313	-0.001039127	0.018900905	-0.002260445	-0.013303691	-0.004972259	-0.014498456	0.04451769	-0.044134808	-0.019687589	-0.022623975	-0.030508117	-0.00664764	-0.028498349	-0.017844521	-0.020527843	-0.022497535	0.034399599	0.011711574	-0.009149703	0.017546757	0.007506078	-0.026707067	0.016880226	-0.009919688	0.00826028	0.008352286	0.031159978	0.01094496	-0.011539848	0.02482396	-0.038679848	0.108664887	-0.026049001	-0.013875111	0.028807241	-0.003432026
ME3	-0.022402954	0.014571495	-0.003985786	0.00960971	0.042484452	-0.011925217	0.05014469	-0.007972219	-0.014550161	-0.015673594	-0.025190109	-0.028369186	-0.012015824	-0.013321355	0.109037471	-0.011348625	0.064225565	-0.017598892	-0.013513372	-0.006502783	0.054141837	-0.012897543	-0.011659772	-0.029791169	-0.010218925	0.042245183	-0.013635279	0.063710528	-0.025132422	-0.028162319	-0.015519993	-0.014182828	-0.020019805	-0.015590033	-0.011501802	-0.017858908	0.014303559	-0.000771028	0.003810627	-0.022683803	0.003348939	-0.007591316	-0.015209977	0.001458805	-0.017953627	-0.000903222	-0.018161148	-0.026764542	-0.017490874
ME4	-8.21E-08	0.008796776	-0.004462258	-0.019289176	-0.011813557	-0.019093343	0.001374256	-0.009961305	-0.014282603	0.000429471	-0.006891759	-0.009692123	0.050329886	0.014596451	-0.023101922	-0.01893622	-0.004379657	0.0018622	-0.007528716	-0.015906274	-0.006089733	0.032692713	0.028289637	0.00099239	-0.017726718	-0.009282414	-0.016242129	-0.013442949	0.075926148	-0.011352825	-0.005793069	0.001451378	0.000228992	0.017989709	-0.008524652	-0.00657161	-0.015108515	-0.008883389	-0.015037897	-0.00891615	-0.009080662	-0.014711465	-0.021473233	-0.007556876	-0.026249969	-0.013016204	0.00334769	0.009440495	0.015637006
ME5	-0.005362423	0.004431249	-0.009693241	0.008378938	0.000682756	-0.01108727	0.004782852	-0.016392834	-0.017612325	-0.014630436	0.000238928	-0.002324115	0.016839639	0.004834071	-0.005228887	0.011384111	-0.008670836	0.010885771	-0.012273492	0.018612507	-0.00799141	-0.003503359	0.002682825	-0.018924438	-0.000472863	-0.005758212	-0.006378881	-0.016754225	-0.009372696	0.004868846	-0.010773472	0.011946584	-0.004149414	0.01152555	-0.014204705	-0.009756663	-0.002875045	0.006247519	-0.007144907	0.000116643	0.00330972	0.005747946	-0.002097812	0.049433548	-0.006481792	-0.009945504	-0.003467776	-0.005496501	-0.001220093
ME6	-0.00346123	0.000698424	-0.002422327	-0.002596463	0.000618701	-0.00235288	0.000502778	-0.001453529	-0.003339123	-0.004387469	-0.003387729	0.011071165	-0.000501409	-0.001787676	0.000499165	-0.003751645	-0.002081149	-0.002311169	-0.003524321	-0.001973523	-0.000735735	-0.002649878	-0.001202125	-0.004597042	-0.003270533	0.013261887	-0.002553996	-0.003753748	-0.002129652	-0.003674891	-0.001296462	-0.001021933	-0.00402586	-0.000644767	-0.002770894	0.003543797	-3.30E-05	-0.001051133	0.009311878	-0.00216446	-0.003927425	-0.003084664	-0.003163732	0.025000949	-0.000678551	-0.00074352	-0.00248862	-0.00374004	-0.002466886
ME7	-0.002339259	0.106472418	0.021432593	-0.022996013	0.021427976	-0.010562188	0.000671443	0.029853118	-0.021146238	-0.013343858	-0.019891957	-0.01840455	0.008589464	-0.00545999	0.006699616	-0.020511148	-0.008688129	-0.018544702	-0.01220852	-0.017556895	0.011436465	0.006724303	0.048936446	-0.017905532	-0.025953112	0.049136577	-0.009389891	-0.021721335	0.008432452	-0.015998624	-0.004248039	-0.021247159	0.007347082	0.039996176	-0.022789961	0.03253963	-0.015580865	-0.008453747	0.02574858	-0.015393571	-0.003037319	-0.012779544	-0.012307923	-0.030217372	0.049272346	-0.012430135	0.038966216	0.028207869	0.024878029
ME8	0.014500375	-0.021435323	-0.025018246	0.036857637	-0.026555471	0.00478117	-0.025171532	-0.019564568	-0.017982814	-0.013896817	-0.017798196	0.026861963	-0.020419287	-0.004625013	-0.025600511	0.032317448	-0.034979305	0.029407586	-0.014123957	0.074760998	-0.052839587	-0.002974146	-0.023307119	-0.027843963	0.016541625	-0.035211861	0.010324418	-0.030776455	-0.031232505	0.047007073	-0.006328914	0.009029319	0.028677758	-0.005199163	-0.003631251	-0.011177253	-0.004845494	0.015094079	-0.000138932	0.021268494	0.027478631	0.018466597	0.055049897	0.001450156	0.058929895	-0.01022948	-0.009374901	0.022031178	0.00417922
ME9	-0.02367591	-0.006397692	-0.009692638	0.031875388	0.014352167	0.00409837	-0.008416525	0.026393167	0.015349207	-0.01680168	-0.033392393	-0.002684678	-0.026443382	-0.021556786	0.118678682	-0.017937956	0.021059102	-0.028088561	-0.015595145	0.006664186	0.011678334	-0.02556452	-0.03058944	-0.040440383	-0.004390722	0.001309233	-0.01932976	0.003135891	-0.028610855	-0.010291147	0.001008792	-0.011134271	-0.014898494	-0.023001868	-0.019455856	0.023095008	-0.001480635	0.000985311	0.021858417	-0.00176747	0.001353917	-0.015991929	0.031940981	-0.03761218	0.071802515	-0.013860109	-0.026175847	-0.005620141	-0.018735244
ME10	-0.00128789	-0.003411736	-0.009471437	-0.010827216	-0.001736809	-0.023346396	0.040506946	-0.018315889	-0.013037572	-0.012501915	-0.012503533	-0.016777245	0.069243767	0.101399562	-0.004451782	-0.0168526	0.010539212	-0.004701879	-0.010462648	-0.009477929	-0.007831992	-0.009263494	0.034617069	-0.006290465	-0.020937069	-0.010384185	-0.02299675	-0.005440963	0.072613318	-0.009427791	-0.008168655	-0.008829834	-0.003631513	0.001126532	-0.016786974	-0.009387363	-0.020724458	-0.010206437	-0.021526671	-0.008388193	-0.013104076	-0.015800402	-0.01431596	-0.01266083	-0.023804266	-0.014799876	-0.009530117	-0.008083921	0.002776905
ME11	-0.002612239	0.000594556	-0.001249401	-0.00113247	0.001342513	-0.003214385	0.001389277	-0.00242696	-0.00335172	-0.002920854	-0.003361349	0.001507791	0.003796923	0.001327638	-0.001657254	-0.003346065	0.000176838	-0.000939895	-0.003543576	-0.001259084	-0.001336091	-0.000172392	0.001018127	-0.003393236	-0.00333807	-0.00176379	-0.003304287	-0.002028806	0.004034734	-0.001587065	0.001974154	0.00014357	-0.001726805	-0.000528295	-0.002587691	-4.46E-05	-0.001813971	-0.000700655	-0.002981128	-0.000138037	-0.00256808	-0.002672872	-0.002398166	-0.001215508	-0.001077216	-0.003577845	-0.001490101	-0.000818059	-0.00083308
ME12	0.021485511	0.011033386	0.052935528	-0.016711493	0.008526177	0.010169507	-0.023562984	0.004093867	0.026648387	0.028234221	-0.023891139	-0.029946461	-0.017299657	-0.029060546	-0.028951373	-0.045534199	0.019588926	0.008707675	0.051862819	-0.010605429	0.006486892	0.013787711	0.000620672	0.122471352	-0.005014548	-0.0182707	0.012134499	-0.016139651	-0.000303565	0.009268306	0.024148152	-0.024484307	0.036758457	0.018043862	-0.002333286	0.003633224	-0.026030787	-0.002887464	0.001899333	-0.027032932	-0.007864016	-0.041514476	-0.01132957	-0.035994401	-0.021492387	0.015616895	0.088422474	0.030719896	0.001063085
ME13	-0.000728445	0.002650649	0.000875674	-0.006592534	3.16E-05	-0.007311773	-0.000424576	-0.005083641	-0.005497761	-0.00261789	-0.006356009	-0.005356722	0.008567395	0.001171441	0.002837506	-0.012083893	0.004637943	-0.003805952	-0.001513442	-0.006874141	0.002680522	0.005166566	0.005272145	0.003835048	-0.006166231	-0.000299136	-0.007908772	0.001067114	0.009105658	-0.005212437	-0.003241289	-0.003893699	-0.001114345	0.002094086	-0.00320272	-0.004415059	-0.003978393	-0.002859847	-0.006578109	-0.007430451	-0.001028196	-0.004055428	-0.007549078	0.006834768	-0.010212347	-0.004248716	9.10E-05	-0.002772751	0.00087941
ME14	0.027984477	-0.019619803	0.01230027	-0.00619535	6.94E-05	-0.002835454	0.013257778	-0.029856938	-0.038963923	0.010609357	0.005390731	-0.007639932	-0.012772051	-0.012757201	0.015380539	0.053136302	0.037640139	0.023218942	-0.015484343	0.03918223	-0.014440405	0.011839145	-0.003509828	-0.026767054	0.023378786	0.008597218	0.032536725	0.002149748	-0.032764008	0.004682359	-0.038577148	-0.004274191	0.028073027	-0.014437405	-0.000706194	-0.046686712	-0.015412327	0.018726852	0.003453019	0.017798743	-0.001661253	0.044731767	-0.008613881	0.003787411	-0.053293208	0.009144088	-0.001295259	-0.016756904	0.003353332
ME15	-0.007224721	0.005890771	-0.0065434	-0.000520305	-0.007628341	0.042198613	-0.006571677	-0.008577858	-0.003191786	-0.007228141	-0.011489692	0.030660403	-0.006399786	-0.004862047	0.000571986	-0.001962845	-0.007452633	-0.007518784	-0.009792327	-0.00508956	-0.013896307	-0.008084822	-0.007422435	-0.014824053	9.26E-05	-0.006797785	-0.004659456	-0.004352509	-0.008873536	-0.008493232	-0.00406062	-0.004386532	-0.005256371	-0.00500248	-0.013551457	-0.009239463	0.016792731	0.010907378	-0.012017165	-0.00396963	0.063450274	0.012343931	-0.012195351	-0.002777153	-0.006597732	-0.00301464	-0.012339773	-0.0089384	-0.004495622
ME16	-0.003182758	3.62E-06	-0.003062109	-0.001522381	-0.001709095	0.00088054	-0.000821246	0.005434774	0.000327634	-0.002508298	-0.004478205	0.992441686	0.000401311	-0.001531782	-0.003067006	-0.003120565	-0.002951806	-0.002055855	-0.003832873	-0.001795773	-0.002595812	-0.001496833	-0.001510145	-0.004048653	-0.002482824	0.003491142	0.001365469	-0.00093942	-0.001151898	-0.001112779	0.005815681	-0.001832996	-0.003141109	0.001262601	-0.003094772	0.004710981	-0.002315512	-0.002020799	-0.001347063	-0.00019771	-0.002483025	-0.001993499	-0.001272513	-0.000898348	0.000861674	-0.001994642	-0.002625829	-0.001195509	-0.00186582
ME17	-0.010854886	-0.00890718	-0.017717678	-0.001219719	-0.014233977	0.026420786	0.012977117	-0.013030102	-0.034562162	-0.019104926	-0.017220672	0.024799489	-0.011748475	-0.014641117	0.030806429	-0.008187884	-0.004079913	-0.024191099	-0.016188317	-0.012738027	0.019116986	-0.02193174	-0.017677845	-0.024236167	0.008349139	0.036164935	0.021500341	0.065328857	-0.023744782	-0.018559188	-0.013742566	-0.00651842	-0.021183482	-0.009772232	0.131595303	-0.024961986	-0.010720809	0.031341032	-0.012563146	-0.01683969	0.032886023	-6.37E-05	-0.005557781	0.122618865	0.036721359	-0.002240718	-0.0185985	-0.027798483	-0.008828804
ME18	0.026432534	-0.006476702	-0.006312961	-0.001437952	-0.009368539	-0.009424161	-0.00482589	-0.008450748	-0.004849739	-0.011937097	-0.010434988	0.002661077	-0.002630584	-0.002596174	-0.007882269	-0.002504253	-0.008397715	-0.002590719	-0.009912585	0.051958908	-0.008212023	-0.006986598	-0.006747826	-0.011136307	-0.008056827	-0.003501357	-0.009209907	-0.011421888	-0.005610537	-0.007314637	-0.011782058	-0.007345008	-0.007861778	-0.005482689	-0.006287991	-0.009402448	0.000519834	0.002159651	-0.009214431	-0.008387835	-0.010713635	0.01793207	0.000161718	0.000852506	0.005208962	-0.000781495	-0.000329526	-0.005056697	-0.005392973
ME19	0.027838494	-0.016691919	-0.016739837	-0.002721146	-0.029448059	-0.02425335	-0.008597806	0.010743785	-0.009965984	0.012553511	0.064423735	0.010580368	0.009301961	0.025963702	0.05398672	0.001552024	-0.017950105	-0.024789792	-0.027505306	0.021318688	-0.012098518	-0.023790761	-0.00080653	-0.033375181	-0.026208298	-0.020017724	-0.041006922	-0.022579548	0.019044688	-0.019064991	-0.022077597	0.015402802	-0.017447261	0.005255179	-0.034276704	0.000453426	0.002996717	-0.014904798	-0.020335477	-0.002098126	-0.010211974	-0.010588554	0.0094837	-0.022408087	0.06066513	-0.037152053	-0.01261096	0.023798264	-0.009499831
ME20	-0.008057332	-0.008532663	-0.004141401	-0.008537843	0.027557335	-0.006468118	-0.004726146	0.006305596	0.002846766	-0.007139534	-0.012974253	0.006023497	-0.001385576	-0.000382334	0.010526374	-0.014962767	0.011183926	-0.010682423	0.001985342	-0.007163866	0.0360167	-0.008258532	-0.003768943	-0.006850702	-0.013361279	0.002625676	-0.011141734	0.019812034	0.002698298	-0.006570603	0.006815957	-0.011300974	-0.005222424	-0.005506902	0.00035733	0.006305479	-0.012680701	-0.008074623	-0.003899373	-0.012033494	-0.011918761	-0.016310118	-0.009272345	-0.010254947	-0.009126216	0.002832784	-0.006964505	-0.008129807	-0.009693798
ME21	-0.003764794	0.002164849	-0.006709037	0.001852717	-0.001368739	-0.004852018	0.001300989	-0.009154412	-0.009509023	-0.006358809	-0.00295605	0.005229986	0.003208848	-0.000862292	-0.007414874	0.006666284	-0.005291103	0.003228906	-0.008312122	0.003967922	-0.005717326	-0.001414761	-0.001719064	-0.008203113	-0.000246206	-0.004562591	-0.001190572	-0.006785905	-0.005183954	-0.002304127	-0.003348128	0.011408927	-0.00400876	0.002113143	-0.00482054	-0.001583614	0.003732949	0.001096336	-0.005082461	-0.000337853	0.006171954	-0.000349462	-0.001775528	0.156595017	-0.00565874	-0.005196358	-0.005398766	-0.004612607	9.92E-05
ME22	0.014244449	-0.027282069	-0.008427129	0.004985051	0.004080274	-0.007563561	0.002243872	-0.006024701	-0.019815193	-0.005358708	-0.021190972	0.026862267	-0.029264764	-0.01926766	0.046807481	0.013509535	0.025932114	0.000221323	-0.021817883	0.061377441	-0.03420772	0.002846838	-0.024184774	-0.040251667	0.008751904	-0.020025605	-0.000834835	0.004773843	-0.036524183	0.026730339	-0.025993114	-0.022195484	0.029720175	-0.019113693	-0.020639142	-0.008025583	-0.026160704	0.013453602	0.022986142	0.033309557	0.002472301	0.008431977	0.038525028	-0.051921197	0.012183438	-0.011010068	-0.009481172	0.004848455	-0.015801549
ME23	-0.003634524	0.002080347	0.003280585	-0.001567704	-0.005475098	0.008439912	0.000686284	-0.00445925	0.005568147	-0.007887802	-0.008572443	0.020751842	-9.29E-05	-0.001189266	-0.001310276	-0.007701203	-0.001921854	-0.005725195	-0.00410451	-0.003434263	-0.007410081	-0.005178683	-0.002084444	-0.007607277	-0.003487978	0.007043781	-0.005709703	-0.003223393	-0.002025755	-0.004321159	-0.002830284	-0.005252353	-0.001391573	-0.004052567	-0.008343709	-2.58E-05	0.001568793	0.00218808	-0.001489761	-0.009655846	-0.000489191	-0.002703009	-0.00426762	-0.004749997	-0.003020477	0.004723499	-0.006148407	-0.004945645	-0.004434502
ME24	-0.004933062	0.004009061	-0.005074309	-0.006101212	0.001478492	-0.00442043	0.038868763	-0.003227556	-0.005498455	-0.004626221	-0.007005669	0.007009613	0.004966815	0.002311561	0.009398327	-0.008646803	0.003289819	-0.005688749	-0.004340922	-0.005546061	-0.003209317	-0.001640726	0.004219682	-0.005342525	-0.006724712	0.010028229	-0.007615282	-0.002439615	0.00525317	-0.005190176	-0.004951025	-0.003374437	-0.004486239	0.002229745	-0.006535432	-0.004087974	5.08E-06	-0.00098835	-0.006614181	0.00173882	-0.002301776	-0.004393539	-0.005671998	0.0023298	-0.005483416	-0.004425665	-0.00452046	-0.003749234	-0.001095219
ME25	-0.006086612	0.000445572	-0.003628657	-0.001329633	0.008440009	-0.00785593	0.005919365	-0.007582196	-0.007099865	-0.00823201	-0.002599929	-0.000892149	0.001580965	0.001076282	0.00059992	-0.003684422	-0.001075124	-0.002121415	-0.006862106	0.000531063	0.000118246	-0.003138861	-0.00336822	-0.008762062	-0.002800266	0.001796222	-0.002384316	-0.000960786	-0.004564589	-0.003655809	-0.005117037	0.002332604	-0.004465652	0.000862023	-0.008199489	-0.003855091	-0.00103297	-0.00121977	-0.003399536	-0.003151732	-0.002439336	-0.000425435	-0.004089476	0.013590038	0.000646779	-0.006822605	-0.00430831	-0.005465166	-0.003119847
ME26	-0.020595768	0.028403851	-0.000974773	-0.017633569	0.06536865	0.010694401	0.048315816	-0.018259365	-0.003274404	-0.028344025	-0.044011245	0.042197947	0.009607645	0.01733927	0.065492834	0.067333081	0.039915754	-0.027279942	0.019350938	-0.007283901	-0.008535824	-0.025205085	-0.016132401	-0.040995238	0.03997953	-0.018579534	-0.025752802	0.009881998	-0.004769059	-0.019240409	0.023796615	-0.022127582	-0.006328378	-0.009073939	-0.029231855	0.013293609	0.023978731	0.030976562	0.02442351	-0.015534591	-0.014616777	0.0652188	-0.001828315	-0.039272886	0.088510519	-0.03882767	-0.023864102	0.003650622	-0.010975371
ME27	-0.002193924	-0.001088728	-0.003130098	-0.001791722	-0.000356668	-0.001944915	-0.002573449	-0.003074647	-0.00016902	-0.004143251	-0.002489025	0.00255411	0.001437592	-0.000116163	-0.002907118	-0.003137044	-0.002211115	-0.002308033	-0.00388337	-0.00212661	0.00443517	-0.003322228	-0.002311046	-0.004492458	-0.000134172	0.000332622	-0.002672431	0.004226944	-0.000933355	-0.00229035	0.012224596	-0.002228892	-0.003251407	-0.001307933	-0.000771514	0.005300801	-0.002463431	0.002129307	-0.002820176	-0.001182701	-0.001372004	-0.003741129	-0.002107986	0.000338862	0.004683588	-0.003155071	-0.003885042	-0.002446725	-0.001133695
ME28	-0.00178281	0.001416613	-0.00033421	-0.002849566	-0.003345093	-0.00473982	-0.00318203	0.00055377	-0.002036297	-0.004318972	-0.005003246	0.027355882	0.004232818	-0.000569329	-0.000939815	-0.0051094	-0.000799976	-0.003596621	-0.003323932	-0.002277004	-0.000808381	0.002128159	0.002725298	-0.004188136	-0.005407388	-0.002879273	-0.000327028	-0.004758411	0.00635785	-0.003471375	0.007245268	-0.000969572	-0.002165699	0.000948427	-0.003902575	0.005014059	-0.000593801	-0.001951698	-0.001484161	-0.001180469	-0.00267984	-0.002126526	-0.004476335	-0.002905568	-0.004037687	-0.00302142	-0.001228463	0.002713837	0.004660647
ME29	-0.009212123	0.089563373	0.004054598	0.034911963	0.034229339	0.028454074	0.008572599	-9.59E-05	-0.026047419	-0.022851817	-0.019630232	-0.011058749	0.012350222	-0.016664368	0.023930709	-0.019104705	0.004575102	0.003376901	-0.01826362	-0.016092535	0.003928108	0.00143677	0.001210598	-0.02552902	-0.022148159	0.020969141	-0.014344036	-0.029965801	-0.016161845	-0.005101955	-0.023126205	-0.016598687	-0.009943061	-0.003946422	0.020367647	0.00999911	-0.022708003	0.015395923	0.008482985	-0.009716291	0.000329299	0.012342382	0.038636405	-0.029057637	-0.002235169	-0.001688722	0.002808138	-0.003817678	0.000893171
ME30	-0.024855506	0.037331739	-0.024878753	0.043061103	0.006789958	0.039183947	0.008182824	-0.025194782	-0.016518541	-0.013517525	-0.023109383	0.011185334	-0.012620961	-0.007150327	-0.01625404	-0.003715031	0.015997417	-0.009825621	-0.009434914	0.036538054	-0.007306185	-0.020689827	-0.015494484	-0.035354122	0.004422617	0.001775252	0.02296242	0.012902526	-0.024739326	-0.012028831	-0.014185021	0.000821592	0.003526131	-0.013160675	-0.019435489	-0.006941408	-0.010775566	0.043380081	0.024025784	-0.010547855	0.014420964	0.013457084	0.005139369	0.042210874	0.00848436	-0.00464394	-0.023753017	-0.009184072	0.02012957
ME31	-0.020526165	-0.009934319	-0.011558345	0.000320275	-0.00635741	-0.017924594	0.033486463	-0.017097708	-0.029210647	-0.007555748	-0.013159477	-0.010811321	-0.000744372	0.00406527	-0.013489993	0.024871586	0.041192304	0.025829804	-0.010191348	0.004918083	-0.003174933	-0.012331546	-0.007294181	-0.022751909	-0.003363335	0.000248652	-0.012148416	0.285583572	-0.01170421	-0.011931062	0.033168902	0.006962983	-0.00073545	-0.003832026	-0.009371176	-0.016166211	-0.000436961	0.002579444	-0.010751622	-0.001273979	0.045317915	0.015170144	0.034479457	0.003628386	-0.014130778	-0.0087247	-0.013010469	-0.013602649	-0.006812802
ME32	-0.016041718	-0.003756575	0.049148973	0.012982748	-0.021634595	0.099597019	0.007876508	-0.011657476	-0.029196977	-0.027856285	-0.013426383	0.027699663	-0.002720326	-0.004042089	-0.00242575	0.005245796	-0.004481462	-0.004052842	-0.031787316	-0.00910169	-0.02168921	0.015781469	-0.021550875	-0.014007688	0.018803938	-0.001711566	0.019880082	-0.030532249	-0.018364887	-0.011759507	-0.009703067	-0.024744246	-0.007909692	-0.012621616	-0.003715915	-0.034419347	0.082382728	0.030245325	0.006227056	-0.009540632	0.006491812	0.034228079	-0.002104624	0.018200902	-0.005889086	-0.014135315	-0.020038041	-0.024938124	-0.000553111
ME33	0.01067584	0.017282016	-0.003515133	-0.01739754	-0.001659843	-0.020927243	-0.022021724	0.007774811	0.010241725	-0.000455654	-0.021068685	0.018642845	0.015121096	-0.007002144	-0.030731942	-0.036221515	-0.004598703	-0.003763034	-0.010048205	0.005141804	-0.03140016	0.012595013	0.022856395	-0.00293774	-0.023271806	-0.039202367	-0.031357333	-0.033437087	0.044094491	0.024585703	0.023291818	0.013617801	0.048874955	0.037476822	-0.019845722	0.025678191	-0.024025816	-0.008145921	-0.011974485	0.006732817	0.003510132	-0.038420496	0.000431958	-0.044007078	0.033162836	-0.022220377	0.013743877	0.06734605	0.020017176
ME34	-0.006468674	-0.007079464	-0.003190071	-0.007661301	-0.004498427	0.001875999	0.000330565	-0.005328524	-0.007681577	-0.00491851	-0.006023651	0.012382051	-0.005681524	-0.005893423	-0.004020138	0.004100349	-0.005951066	0.008369353	0.005844117	-0.004112286	-0.007804831	-0.002049025	-0.006651086	-0.009434293	-0.000659826	-0.003274631	-0.003632978	-0.00489081	-0.008364	0.003203164	0.002783423	-0.003473125	-0.003620201	-0.007451433	-0.005141931	-0.001504854	-0.001795445	-0.004388217	-0.003208626	-0.006976232	-0.001259043	-0.002312084	0.021917934	0.266135729	0.013174241	-0.003348822	-0.005185954	-0.004051051	-0.003851111
ME35	-0.014662125	-0.001510278	-0.00772455	0.016565766	-0.00338501	-0.001675378	0.020592492	-0.024239489	-0.000692979	0.008877995	-0.004558071	-0.02720074	0.029092745	0.029387139	-0.019526284	0.055595559	-0.001765293	0.03024444	0.000248733	0.00634849	-0.02833581	-0.002165515	0.010224482	-0.026927691	0.006602403	0.005318374	-0.018030781	-0.039389269	-0.009068447	-0.020815106	-0.019287061	0.037869379	0.01444726	-0.011105138	0.00444824	-0.009449863	-0.000702814	0.014577784	-0.014478243	0.001816589	0.0134829	0.04322595	0.019992607	0.086073039	-0.035504835	-0.006435227	-0.012887099	-0.01037582	0.001154071
ME36	-0.012857299	-0.00936023	-0.027204936	-0.002994655	0.001733111	0.025434394	-0.003278588	-0.023312329	-0.013503501	-0.018082243	-0.020358819	0.058178839	-0.0215246	-0.012400653	0.011071629	-0.011927042	-0.011031057	-0.031271854	-0.015728932	0.025344648	-0.02843717	-0.019782601	-0.022636842	-0.021339199	-0.004945079	-0.007158278	0.015958339	0.02387379	-0.026956845	0.022580337	0.001864212	-0.009081478	0.001582023	0.003976229	0.032468488	-0.008741244	-0.01578226	0.064768621	0.00473474	0.006411463	0.036438135	-0.02138445	0.015327016	-0.008701645	0.139114025	-0.018080415	-0.011881631	-0.002024865	-0.015993535
ME37	-0.005013845	-0.000181912	-0.00113878	-0.003558877	0.011890243	-0.000457144	0.001260095	-0.002083246	-0.001351337	-0.005003292	-0.007398946	0.000171015	-0.00142164	0.000444339	0.001256327	-0.001100788	-0.003130679	-0.005150609	-0.004271057	-0.001833741	-0.002290526	-0.002469258	-0.005845586	-0.007084237	-0.003943411	0.01137217	-0.00342852	0.010011131	-0.000925625	-0.004037488	-0.00088769	-0.00280434	-0.006387728	-0.005105409	0.001473576	0.003390847	-0.002486465	-0.001403661	-0.0029263	-0.004508076	-0.004703785	-0.006259445	-0.001885731	-0.000252577	0.000342123	-0.002542453	-0.005598947	-0.007255379	0.006142859
ME38	-0.00271889	-0.003118182	-0.004315339	-0.006048293	0.018593513	-7.46E-05	0.005833149	-0.000676605	-0.002499721	-0.006103467	-0.000150494	0.002900181	0.000543934	0.00369463	-0.003807193	-0.009192943	-0.003998789	-0.007523904	-0.001828618	-0.001773412	0.010433815	-0.004882657	-0.000279436	-0.006419365	-0.007847268	0.009546522	-0.007456467	0.013931797	0.0010784	-0.005333135	0.002816852	0.002204266	-0.005528861	-0.001086949	-0.000269472	-0.001603435	-0.006062241	-0.00184061	-0.00410431	-0.00591245	0.002513824	-0.004062036	-0.005438007	-0.002162376	0.003159352	-0.001801841	-0.004671359	-0.00408051	-0.004498159
ME39	7.59E-05	0.001185386	-0.000766893	-0.008937941	-0.001258789	-0.008119342	0.006421866	0.001508155	-0.003084002	-0.008320131	-0.008179826	0.007108913	0.005852678	0.024418063	-0.007641047	-0.009608299	-0.002451148	0.004483776	-0.003062493	-0.005055142	-0.003677259	-0.004436222	0.00449647	-0.00541945	-0.005220882	0.004471262	-0.006956711	-0.00265895	0.010155697	0.001820878	-0.00182976	-0.005456169	-0.002611994	0.00250658	-0.005213631	0.005457558	-0.008910298	0.000899219	-0.006223608	-0.002122399	-0.00735255	-0.008614442	-0.009239966	-0.007926844	-0.006109869	-0.004474709	-0.003320595	-0.000996324	-0.003827233
[truncated: 1,027 more columns]
