# Supplementary material for: MOGAT: A Multi-Omics Integration Framework Using Graph Attention Networks for Cancer Subtype Prediction
Source: Int J Mol Sci. 2024 Feb 28;25(5):2788. doi: 10.3390/ijms25052788 (PMC10932030; doi:10.3390/ijms25052788)
Supplement: Supplementary file 1 [file ijms-25-02788-s001.zip › Supplementary Material S5_Eigengene_METABRIC.csv]

	MB.2747	MB.0384	MB.6103	MB.7254	MB.4709	MB.5062	MB.4350	MB.4757	MB.2556	MB.4675	MB.3459	MB.6113	MB.3412	MB.3838	MB.2951	MB.4739	MB.5105	MB.4968	MB.5251	MB.0380	MB.4865	MB.4012	MB.5273	MB.4254	MB.4674	MB.0365	MB.7040	MB.2769	MB.6145	MB.3063	MB.4634	MB.4729	MB.0309	MB.3871	MB.7158	MB.6330	MB.3429	MB.0386	MB.4421	MB.3037	MB.4354	MB.5433	MB.3122	MB.6152	MB.5073	MB.4801	MB.0422	MB.0303	MB.0442
ME0	-0.031126851	-0.032659831	0.002892563	-0.00413202	0.017131496	0.02511404	0.02495638	-0.002164143	-0.032830763	0.032806173	-0.018993994	-0.006207112	-0.029985495	0.020107755	-0.029949296	0.004644685	0.018980657	0.007137246	-0.01051228	-0.029686073	-0.09404987	0.070081762	0.02308952	-0.015581262	0.037560773	-0.06552638	0.002203509	-0.010500577	0.030042179	-0.060736819	0.035870326	-0.00177242	-0.00216479	-0.00221774	0.015098228	-0.00361602	-0.018573479	-0.018909027	0.048201816	-0.022082967	0.045248472	0.027397519	-0.010416636	-0.013778473	0.022106997	-0.010881291	-0.003933902	-0.023086786	-0.003637062
ME1	-0.028100236	-0.020427639	-0.006849671	-0.005250998	0.011445596	-0.003428571	0.110737616	-0.012949338	-0.005172381	0.005938463	-0.01268148	-0.009167701	-0.022487664	-0.025487434	-0.030952888	-0.012312591	0.018203526	-0.002090835	0.003676121	-0.027109874	-0.01370857	0.096061221	0.011285545	0.005360159	0.017777733	-0.02130349	-0.032869689	-0.020999679	0.054777559	-0.021122299	0.016512785	0.024849516	-0.005227006	-0.021601167	0.016211163	0.015271857	-0.009332547	-0.014923502	0.065767814	-0.019115667	0.053428808	0.011057833	-0.016176384	-0.008125545	-0.018147991	0.005189285	-0.023007025	-0.027190725	-0.030936842
ME2	-0.019004956	-0.009245848	0.009974294	-0.029387572	-0.024468499	0.024926796	0.036399836	0.022044936	0.020618359	-0.030492096	0.044732449	-0.006931822	-0.008426492	-0.038389971	0.011861407	-0.010720665	-0.026655284	-0.007245829	-0.003656347	0.009954354	0.031221657	-0.028878507	-0.015802056	0.04281584	-0.043895918	0.064716026	-0.000179836	0.006029152	-0.010202224	0.008409027	-0.020217231	-0.028148926	-0.017725512	-0.012959325	0.06993289	0.06785695	0.006181849	-0.006135887	-0.037072767	-0.015047193	0.024436834	-0.037165973	0.007889788	0.049753557	0.011430381	-0.033087992	-0.019598106	0.047443342	0.027802205
ME3	0.012900933	0.023535384	0.018858729	0.010662733	-0.016232696	-0.031359309	-0.008009108	-0.004816963	0.015090094	-0.019010675	-0.002336225	0.018816785	0.055410037	0.045906011	0.055818055	-0.022950796	-0.035888861	-0.001254318	-0.014967692	0.004937111	-0.015899095	-0.054945811	-0.022412633	-0.003764963	0.030889118	-0.00296018	0.002560367	0.039105969	0.001293838	0.017457488	-0.008468772	-0.006920988	0.010931003	0.015194469	-0.029500154	-0.014711805	0.046817271	-0.050722034	-0.006501674	0.0165537	-0.01224882	-0.027144372	0.049405237	0.005384227	-0.037245037	0.054257792	-0.038856691	0.033765057	-0.021494112
ME4	0.031767642	0.017408969	0.008720725	0.009911824	-0.010363331	-0.010577027	-0.097393639	0.000583852	-0.040667011	0.010029314	-0.023531813	0.018174657	0.018138191	0.042068654	-0.021864764	0.007014263	-0.001536764	0.003638166	0.004680057	0.044109763	-0.000386643	-0.076440618	-0.022390267	-0.021217608	-0.015848147	0.004127136	0.031732102	0.023025032	-0.024359087	0.005389439	-0.011700693	-0.015059026	0.013919547	0.031917809	-0.038645826	-0.024394432	0.003432215	0.020822924	-0.058183343	0.019490872	-0.063176271	0.007763877	0.008618227	7.12E-05	0.007017813	-0.006050334	0.029518044	0.022618997	0.016595512
ME5	-0.022483093	-0.003784935	-0.02516558	-0.011065316	-0.021818571	0.020024679	0.004466189	0.055000897	-0.034926088	-0.03100127	-0.001456036	-0.009976269	-0.034340291	-0.005915816	0.002062205	-0.027177276	-0.001090956	-0.011060147	-0.026215495	0.02974723	0.048259451	-0.001992678	0.019046655	0.050934983	-0.022133011	-0.002624521	-0.016199613	-0.012193859	0.023127538	0.037839838	-0.008914804	0.007524429	-0.0462817	-0.023718973	0.015255782	-0.012920312	-0.047056103	-0.006519889	0.001600652	-0.034521137	0.004572123	-0.000632106	0.035001117	0.031312182	-0.027670576	-0.010784143	-0.018585059	0.029020932	-0.055799404
ME6	0.017111699	0.009946893	0.003238838	0.011759152	0.018419058	0.012056253	-0.004776316	-0.059855345	-0.035213621	0.025344433	0.006090828	-0.015757311	0.011259135	0.0228869	0.007132071	0.014508377	0.024805335	0.027108019	0.020958523	0.015231356	-0.064362526	0.012330965	0.012407226	-0.066962521	0.03528048	-0.01265535	0.013793618	0.019634238	0.024536766	-0.067625831	0.011324986	0.009799768	0.023366037	0.008227771	-0.045835617	-0.004281309	-0.001683343	0.004038494	0.025994093	0.015345824	0.009880278	0.0309066	-0.020918184	-0.032876906	0.009372391	0.018611744	0.018838787	-0.055897597	-0.00182785
ME7	0.016904772	0.013329921	-0.00991282	0.00633642	0.011232464	-0.033681711	0.000768129	-0.017601064	0.048282355	-0.034810876	0.020984838	0.033179017	0.039048039	-0.036501329	-0.025507671	0.051584588	-0.00033962	-0.016957637	-0.027047717	-0.036309651	0.015154422	-0.037418102	7.93E-05	-0.0210147	-0.025939989	0.017855188	-0.005693466	-0.014780021	-0.03753747	0.027955551	0.020808847	-0.030749644	0.001931464	0.011164344	0.020502028	-0.020235213	0.028842714	0.031912891	-0.020221395	0.013550161	0.007106254	-0.01992622	-0.014550414	-0.001192483	0.010990174	0.011100712	-0.00537006	-0.014088262	0.050916665
ME8	-0.004059997	-0.00830413	0.012745904	0.005834519	-0.003082526	-0.023879562	-0.014528632	-0.007253306	0.080086505	-0.023018109	0.022891345	0.003070005	0.012960072	-0.022108744	0.017096324	0.011349553	-0.002118821	0.011213673	0.007343702	-0.036783382	0.002361871	-0.030228502	-0.019599385	-0.035426675	-0.036481569	0.012163001	0.0258927	0.020517121	-0.007630574	-0.015115919	-0.006874557	-0.036327307	0.000990785	0.047512037	0.007614151	-0.002220254	0.087878751	0.030643428	-0.028808666	0.01994117	0.001683764	-0.025236549	-0.022596984	-0.006355319	0.029822129	-0.012298267	0.009920875	0.000787764	0.082969057
ME9	0.014998154	0.046195863	-0.024052237	-0.017391541	-0.018624606	-0.012841554	0.073831571	-0.015796604	0.014216006	-0.020634927	-0.003669067	-0.017823381	0.00353799	-0.029342593	0.002959253	0.004288679	-0.001197517	0.006997702	0.024135899	0.039172395	0.123143535	-0.02127599	-0.012479407	-7.40E-05	-0.003546377	0.073408416	-0.009555804	-0.027216721	0.000829974	0.032175007	-0.024593357	0.010190243	-0.00048166	-0.013298832	-0.031464376	0.020218017	-0.012881121	0.033870329	-0.023085628	0.000181822	-0.023984579	0.001774822	-0.013892127	-0.011272345	-0.027807566	0.002652899	0.024849727	-0.002168786	0.055364376
ME10	0.004457291	0.020486891	-0.002855815	0.004317651	-0.023849452	0.006824435	-0.072169245	0.051960232	-0.023671304	-0.022752153	0.000762082	0.015719897	0.004466046	0.016379535	0.014466587	-0.005137285	-0.019501046	-0.019673432	-0.021864221	0.031819761	0.049288603	-0.073140039	-0.017818225	0.041590043	-0.028235681	0.010937194	0.011915954	-0.003076659	-0.033082234	0.054501034	-0.021594173	-0.005829029	-0.019621319	0.007168117	0.00065474	-0.015596013	-0.017794949	-0.005798365	-0.052531063	-0.002515182	-0.036644744	-0.016763614	0.04811004	0.036102305	-0.020577928	-0.006805271	0.001509996	0.042592271	-0.019608391
ME11	-0.019430075	-0.006709951	0.005638207	0.014865196	0.001891044	-0.023230659	-0.005429829	0.048702391	0.04480313	-0.007546276	-0.012556456	0.011619573	-0.012432856	-0.034458288	0.013193158	-0.010380551	-0.008001757	-0.006067731	-0.012274012	-0.036205556	0.054852168	-0.017647323	-0.017289532	0.051385466	-0.034727411	-0.012431583	-0.005484691	-0.02321902	-0.022844587	0.060602156	-0.009242935	-0.002527113	-0.016469254	-0.002749906	0.023770978	-0.014121568	0.028024342	-0.001870755	-0.024049886	-0.010495144	-0.013915807	-0.015074664	-0.018210209	-0.002382464	0.003108805	-0.015171676	-0.006297035	0.057187361	0.013424077
ME12	0.021894708	-0.018247153	-0.014755316	0.055094884	-0.008008174	-0.009342357	-0.010630985	-0.028239636	0.052396074	-0.021680939	0.05098881	-0.008144622	0.018894692	-0.019913918	0.070337958	-0.018158845	-0.00601125	-0.005500807	-0.010209233	-0.00941717	-0.012688142	-0.007424166	-0.00761839	-0.004419264	-0.020413951	-0.010797094	-0.01135727	0.046588949	-0.016399418	0.011187384	-0.00546472	5.80E-05	-0.011133792	-0.014636829	0.058438712	-0.023853573	0.017345236	-0.020668252	-0.008680657	0.011010283	-0.018154997	-0.020691194	-0.019927347	-0.009010226	-0.013386087	0.024279965	-0.015857215	-0.008681797	-0.022509543
ME13	0.033557849	0.022569643	0.016088034	0.013095123	0.006750428	-0.016109366	-0.084114391	-0.037367358	-0.000701528	0.023433887	0.005186494	-3.87E-05	0.025421778	0.031385571	0.023711314	0.018535816	0.003965126	0.024969618	0.02436002	0.009379743	-0.039130935	-0.057220005	-0.004015614	-0.053802133	0.022838652	0.000429517	0.026428247	0.036894133	-0.015232015	-0.039375413	0.007546101	-0.014133272	0.037098211	0.029333707	-0.040118605	-0.015274145	0.029206855	0.008802535	-0.012801291	0.036684696	-0.039717473	0.018643643	-0.017639388	-0.026293886	0.028628784	0.021310284	0.027760139	-0.014950047	0.035456125
ME14	0.022510578	0.024303057	-0.013173895	0.03540687	0.080994775	-0.005318172	0.036636684	0.002840283	-0.045873541	0.054928697	-0.016110999	-0.020864985	0.030565995	-0.002197352	-0.030040417	0.002065823	0.015320173	-0.029250992	0.015195208	-0.016094207	0.003831911	0.059958509	0.020610496	0.019018288	-0.015253579	-0.021969707	-0.040537961	-0.034940378	-0.017784559	0.007576439	0.015442698	0.023605107	0.035804148	0.009949621	-0.016029971	-0.011209839	-0.020657541	0.014748054	0.026858676	0.010006724	0.029511628	-0.033955071	-0.010707756	-0.038093868	-0.039297417	0.030223992	0.007922892	0.027342265	-0.033950466
ME15	-0.010365412	-0.014059333	-4.05E-05	-0.016358571	-0.00825447	-0.00608115	0.002565794	-0.002186832	-0.005630199	0.005067792	-0.003122882	-0.00279768	-0.012791356	0.098761095	0.04009283	-0.008257935	-0.011935741	-0.00925509	-0.009229401	-0.006201249	-0.015313932	0.001045186	0.138153255	0.018556968	0.0992479	-0.009028135	0.004855616	-0.012541073	-0.007832147	-0.007344272	-0.001557987	-0.00849719	-0.013058334	-0.011261799	-0.006463138	-0.007018383	-0.009816112	-0.002691662	0.081373278	-0.018976642	-0.002684297	-0.012085241	-0.011548869	-0.00755878	0.128919602	-0.00379657	-0.010946274	-0.01476172	-0.005855049
ME16	-0.016374187	-0.025946283	0.005288264	0.026030449	-0.025133533	0.011328792	0.035150121	-0.006561399	0.052675264	-0.008864661	0.001716078	-0.010529405	0.023684412	-0.004702107	-0.015762003	-0.00852832	0.025820647	0.020806887	0.013301531	-0.047087627	0.037664538	0.054115095	0.012226793	-0.037217079	-0.038451961	0.021952407	0.007510225	0.011585509	0.020465356	-0.020038113	0.014623549	-0.033645434	0.001727025	0.040771431	0.015182582	-0.00241132	0.065792801	0.037300585	0.026308573	0.004289126	0.050088125	-0.006874463	-0.034841231	-0.003461347	0.048447704	0.005239582	0.000248453	-0.009181061	0.049629432
ME17	-0.021403038	-0.017866468	0.013791928	-0.014752399	-0.018856797	-0.003696321	-0.009179279	-0.013226564	0.022559787	-0.015452267	0.028845244	-0.010920488	0.015328589	-0.017465731	0.049503857	-0.0119285	0.043227506	-0.005432602	0.015021054	-0.025011845	-0.020033589	-0.010349014	-0.020737583	-0.021828717	-0.025183594	0.008358272	0.014550978	-0.000811793	0.018628819	-0.023368183	-0.012378472	-0.025891499	0.01178738	0.075360448	0.023715846	-0.021189471	0.021013072	0.116017609	-0.007608167	0.024336729	-0.005611526	-0.015303263	-0.01680093	-0.012261643	0.033111985	-0.017506171	-0.005269786	0.022611947	0.054021155
ME18	-0.021889844	-0.025732256	-0.02906676	-0.038708222	-0.0184651	0.021779205	0.002826993	-0.002944359	-0.027334891	0.001017276	-0.007844938	-0.026461652	-0.031160839	0.005448861	-0.023526679	-0.026785947	0.003533753	-0.019221313	-0.010980361	0.058197637	0.037393519	-0.01302761	-0.007491443	0.028876116	-0.009875978	-0.041783888	-0.022574935	-0.001335749	0.014856188	0.002043693	-0.017610551	0.007724439	-0.027705618	-0.016879857	-0.038040376	-0.020984867	-0.030487122	0.031631055	-0.001724559	-0.027059061	-0.025099179	0.046145344	0.027720206	-0.002419086	-0.018418472	-0.003940482	-0.031364466	-0.011514269	-0.048280344
ME19	-0.023201868	-0.007119576	-0.000730649	-0.028843197	-0.015076228	0.002858887	0.051199107	0.041130982	-0.029217542	-0.029096206	0.034120935	-0.01459698	0.007595653	-0.043049579	-0.011690201	-0.007655982	-0.031374619	0.000846851	-0.008367789	-0.01839894	0.010851009	-0.048250796	0.013533724	0.044935584	-0.018607224	0.032902869	-0.019994668	0.010169911	-0.024513392	0.025466102	-0.023546605	-0.031592406	-0.031532697	-0.022399727	0.030952864	-0.007825464	-0.024552796	-0.01621285	0.011725333	-0.028304848	-0.007360449	-0.020939456	-0.024016735	0.015958147	-0.027688919	-0.017461696	-0.002237764	0.001936569	0.01039112
ME20	-0.016302211	0.013532488	-0.013205289	-0.009420934	0.000374968	0.008082831	0.031320801	0.03568195	-0.026502471	-0.006263268	0.016078223	-0.032346319	-0.033041352	-0.015092835	0.018333426	-0.015175624	0.000916203	-0.008518666	0.005179277	-0.0122569	0.04764592	0.048414487	0.007407972	-0.008038709	-0.000834895	-0.028753994	-0.018119205	-0.009784879	0.058714788	0.009275876	-0.014137753	-0.033501287	-0.015423478	-0.052423138	0.021001886	0.00125371	-0.030978309	-0.042911745	0.043553998	-0.023425686	0.056192165	0.034361429	0.00539496	0.018254169	-0.02742638	-0.030049752	-0.026828097	-0.005315344	-0.037339974
ME21	-0.011963108	0.003785276	-0.020098354	-0.023191717	-0.034917492	0.01567242	-0.106754492	0.029917662	-0.026966434	0.00165608	0.003666654	-0.005257664	-0.009743068	0.021757264	0.006106481	-0.01809101	-0.014582606	-0.006452055	-0.018183723	0.071547154	0.028596378	-0.104678931	-0.015741364	0.022289177	-0.010936739	-0.008389936	0.002291639	0.023809518	0.013186376	0.043439295	-0.02824784	0.010794584	-0.017196505	-0.002175507	-0.01502328	-0.031487976	-0.024845985	0.020573711	-0.044089304	-0.008466609	-0.065025395	0.048502122	0.026967263	0.003115235	-0.001807068	0.006254632	-0.011510805	0.012233913	-0.019205835
ME22	-0.001373852	0.020815996	0.006120043	0.009613138	0.00299439	-0.025724312	-0.086043001	0.000390937	0.005359315	0.017572298	0.011440291	-7.90E-05	-0.034598442	0.039609364	0.044459104	-0.010677422	-0.010881327	0.012685208	-0.007567865	0.005915754	-0.023593714	-0.074552847	-0.00727512	-0.019561804	0.000353174	-0.017840696	0.028485979	0.017790176	-0.01664532	-0.008707013	-0.018859048	-0.025425717	-0.006571931	-0.001116967	-0.002726428	-0.013383594	0.03236245	0.008225516	-0.065968275	-0.006480117	-0.050772736	0.003601089	0.011693597	-0.017453687	0.00353091	0.005042013	0.007301343	-0.005065155	0.014520823
ME23	-0.011290892	-0.018160157	0.010670239	0.000293794	0.030799573	0.029095612	-0.07911257	0.014513196	0.005504561	-0.034923159	-0.008811585	0.043118274	-0.00730706	-0.027350801	0.025124404	-0.014091206	-0.02788384	-0.010385868	-0.025848882	0.015677528	0.020914349	-0.071800486	0.014480499	-0.003793649	-0.043589868	0.009519087	0.033985045	-0.00909068	-0.049125794	0.024390832	-0.041554074	0.003481972	-0.019304757	0.001114564	0.002363564	-0.002604152	-0.014925586	-0.001184014	-0.05958726	-0.02849616	-0.002106645	-0.024324514	0.00887284	0.073747337	0.007061347	-0.016583573	0.015810759	0.029836487	-0.002577878
ME24	0.017897022	-0.004384878	0.002966439	0.016859534	0.056531569	-0.015801638	0.088115111	-0.018098195	-0.025952371	0.008374364	-0.005884347	0.002397337	0.011132214	0.025273828	-0.027986824	-0.017548185	-0.053812055	-0.03131758	-0.051688828	-0.008694818	-0.024081167	0.072787538	-0.037603373	-0.022227136	0.034205299	-0.023942039	0.024375161	-0.015787526	0.005637475	-0.000809993	0.009997142	0.014544979	-0.019016377	-0.001468073	0.016264503	0.002870011	-0.046102072	-0.015584087	0.061427581	0.009339709	0.065616416	-0.02112097	-0.008434947	-0.000244792	-0.060922606	-0.02318953	0.002980545	0.010916901	-0.032601867
ME25	-0.039935798	-0.043096076	0.007239772	-0.007475331	0.050937975	0.041110862	0.032630406	0.005390053	0.003859105	-0.028528393	-0.023209717	0.036626473	-0.034135653	-0.045759796	0.001408741	-0.025012217	-0.008599961	-0.023977375	-0.020946668	-0.021663743	0.00943377	0.024415913	0.031384132	-0.006474286	-0.033773428	-0.00650741	0.007711894	-0.046580716	-0.011262543	-0.004438292	-0.025540263	0.021925803	-0.030148887	-0.022944501	0.023760837	0.012080916	-0.017857084	-0.011651562	-0.002080074	-0.043823947	0.055396463	-0.027233139	-0.004500032	0.082918675	-0.000528556	-0.016396663	-0.002705589	-0.001829064	-0.029485263
ME26	0.036496645	0.043057329	-0.004121371	0.03586241	0.05104337	-0.016840328	-0.07342079	0.016851486	-0.0357998	0.035780141	-0.015047235	0.005131687	0.047888532	0.024596755	0.016060925	0.000971304	-0.006204633	-0.026075198	0.008117609	0.026500599	0.017626959	-0.046556899	-0.018431853	0.012693529	-0.028894231	-0.010545671	-0.012537528	-0.009474324	-0.057882221	0.002088468	-0.00525135	0.009764622	0.037765029	0.035769338	-0.038515394	-0.032014903	-0.014567318	-0.001806475	-0.037566175	0.025488407	-0.021668967	-0.033100243	0.006983986	-0.029251779	-0.033589011	0.037080583	0.021686829	0.027331893	-0.018070696
ME27	-0.050386114	-0.024197983	0.011288819	-0.02875161	0.005699713	0.036182252	0.117546532	-0.003422432	-0.010256561	0.014095954	-0.026517659	0.02187112	-0.037275575	-0.010995948	-0.00640993	-0.003514811	0.020049845	-0.008074427	-0.004435956	-0.020736003	-0.010914938	0.11331098	0.004345764	0.016225478	0.024897436	-0.029473378	-0.024920052	-0.039577832	0.038434029	-0.030406064	0.006871705	-0.001996008	-0.032119043	-0.014427212	0.022449965	0.003042117	-0.039137459	0.001943666	0.038894407	-0.04749317	0.039111006	0.031679	-0.027942485	-0.02681443	-0.001749459	-0.017891996	-0.016063071	-0.008717109	-0.007400202
ME28	-0.008325465	-0.004355485	0.009972224	-0.003748987	-0.016690734	-0.019348195	-0.037082714	-0.019410778	0.017556158	-0.021873534	-0.006647296	0.012491662	-0.003680486	-0.003438115	-0.012348837	-0.023094345	-0.023614574	0.002581025	-0.021541661	-0.028077553	-0.000692964	-0.033068265	-0.034096786	-0.012425018	-0.036957911	0.021255871	0.005111658	-0.006803232	-0.001833413	0.013855555	-0.024173213	-0.028188881	0.073423464	0.073238998	0.014155944	-0.014606706	0.04031371	0.03922616	-0.03474135	0.005671426	-0.027364533	-0.036565289	0.002395447	0.032855397	-0.02260107	-0.033015351	0.04311178	0.042288123	0.051792716
ME29	0.039622223	0.014630363	0.022418876	0.028705785	0.056810375	-0.022761457	-0.006768055	0.000390226	-0.026742813	0.006820647	-0.003943787	0.027679468	0.031353472	0.050355148	-0.020460153	-0.018246765	-0.064657685	-0.035344274	-0.057414791	0.012482415	-0.028807697	0.004593469	-0.049193029	-0.029906037	0.02209067	-0.012194869	0.035604157	-0.01149124	-0.024067684	0.012763088	0.006032589	0.002869576	-0.006410269	0.020906009	-0.003640188	-0.002609096	-0.041461263	-0.004558743	0.011338064	0.029909496	0.034094203	-0.033259084	-0.00951721	0.009532192	-0.068476946	-0.029475065	0.029864694	0.034560855	-0.014512486
ME30	0.013429106	-0.011869873	0.01935971	0.000525816	0.066894012	0.004941245	-0.032893503	0.00437623	-0.045646664	-0.015868173	-0.029908691	0.037089086	-0.014994863	0.029437494	-0.012788449	-0.011841436	-0.004316865	0.013044988	0.014744068	0.020754765	0.009912004	-0.012637018	0.00156123	-0.012335199	0.012011105	-0.015463869	0.029651332	-0.01160857	-0.013123313	0.00476396	-0.029290978	0.013445656	-0.005666759	-0.021864405	0.003167687	-0.020422734	-0.01589162	0.025686109	-0.018342503	0.004300278	0.019870108	-0.000825247	0.089130829	0.006130515	-0.006617825	-0.020101635	0.000723066	0.004555546	-0.024872907
ME31	-0.015172018	-0.002409349	-0.008190231	-0.00511124	0.011406109	0.006287717	0.059605758	0.012965788	-0.022576123	-0.003368482	-0.007186625	-0.039222863	-0.032155511	-0.008233707	-0.025453419	-0.004403257	0.012633715	-0.003948961	-0.00142654	5.31E-05	0.024285261	0.07686157	0.009625851	0.046319586	-0.000646828	-0.004111014	-0.010777131	-0.022104125	0.035816522	-0.044657893	0.001599157	-0.000545935	-0.010074562	-0.027149755	0.042647353	0.015428787	-0.030176323	0.008246479	0.032416059	-0.010616676	0.051722597	-0.007725306	0.046622356	0.002726181	-0.011531535	-0.026537595	-0.009241983	-0.027139705	-0.028627307
ME32	-0.018616833	0.015228283	0.016875049	0.003353226	0.000995175	-0.027287656	0.132862475	0.005747458	-0.003663935	-0.024027738	-0.007139708	0.00046787	0.007503387	-0.005527759	0.020248581	-0.026285104	-0.016783996	0.004759683	-0.011426857	-0.02149285	-0.013153374	0.035606755	-0.010636177	0.011088492	0.031521236	-0.018660456	-0.014217271	0.0086494	0.041815031	-0.001857447	0.002771821	0.012386761	0.003449655	-0.002839009	-0.002331367	9.87E-05	0.013002378	-0.044876783	0.043088801	0.000268047	0.04677684	-0.020266718	0.024557988	0.007093646	-0.040199148	0.037552921	-0.038711126	0.013599668	-0.036626868
ME33	-0.001334043	-0.018949004	0.052560451	-0.002041889	-0.015544359	-0.008973203	0.05303904	-0.015015416	-0.014938617	-0.007707392	-0.02422294	0.046207313	-0.019952727	0.018504062	-0.022109913	-0.023753603	-0.016324697	-0.018485004	0.027442818	-0.009969796	-0.023217602	0.145464611	-0.023437306	-0.008890493	-0.002584793	0.006521347	0.001734254	-0.021367201	-0.002275702	-0.016102368	0.015263224	0.063737088	-0.003931721	-0.004177744	-0.01796579	0.086563639	0.028274302	-0.026957361	-0.014892764	0.010473932	0.012233097	-0.01475376	0.07377647	0.042511524	-0.027861727	-0.030588186	-0.008267608	-0.011476939	-0.029663281
ME34	-0.007381925	-0.004070358	0.00816073	0.009053875	0.001418518	-0.000780667	0.010604002	-0.000929989	0.955061258	0.006864495	0.000212545	-0.001446423	-0.004581758	0.00079348	-0.010378942	-0.004205061	-0.006248553	-0.007028063	-0.001242342	-0.001749611	-0.006430757	0.015598998	-0.01387086	0.007759014	-0.005757833	8.98E-05	-0.00051161	0.007704146	-0.003471809	-0.016047671	0.000635612	0.00449905	-0.010952766	0.006032545	0.006016071	0.010441561	0.004437438	-0.003977308	-0.000903029	-0.010793863	0.000659363	0.001274929	-0.011952735	-0.003877151	0.001363735	-0.002858184	-0.002907224	-0.004446968	0.002723151
ME35	-0.017612048	-0.008950514	0.009084163	-0.002100094	-0.013645976	2.66E-05	0.093158923	0.013981626	0.025719245	-0.011781316	-0.005792859	0.022953395	-0.009663778	-0.00912884	-0.016069876	0.004030358	-0.017107729	-0.023228518	0.021620244	-0.020190111	0.007744408	0.040106999	-0.026128434	0.021193983	-0.01471524	0.013313655	-0.014501528	-0.022974654	-0.032724713	0.014600935	-0.000626019	0.034957436	-0.023519509	-0.011564018	0.046756484	0.082645081	-0.008709743	0.015438502	-0.022230793	-0.004651126	-0.015402563	-0.022358215	0.027383002	0.047570787	-0.021075326	-0.01451788	-0.012006524	0.021313456	-0.017709883
ME36	-0.013204065	0.001594461	0.019916045	0.034857493	0.016697099	-0.016167234	0.001400744	0.015719486	0.084550974	0.013329236	-0.018118023	0.003137605	-0.017862041	-0.025432276	0.040961443	-0.019953497	0.008251088	0.013664928	0.000564021	-0.022588036	-0.010322495	-0.013663171	-0.011772959	-0.011187632	-0.023308118	-0.013911912	0.003844493	-0.020217967	-0.005112026	-0.016400477	-0.012264098	0.008881901	-0.018262948	-0.007753804	-0.017828536	-0.014116226	0.063939167	-0.012710884	-0.00725101	-0.008097237	-0.004405752	-0.011777561	-0.019294589	-0.007091678	0.004748018	-0.006095191	0.002501106	0.017893834	-0.002797874
ME37	-0.003442569	-0.006335747	0.16938938	-0.01208203	-0.001308607	-0.011244585	0.01513873	-0.005503925	0.011189654	-0.003499721	-0.008937661	0.007945523	-0.006545749	-0.000252638	-0.011156184	-0.011553208	-0.009354248	-0.014020352	0.065772317	-0.007652841	-0.014714315	0.081287206	-0.01404101	-0.002304727	-0.014386453	0.001546395	-0.007736332	-0.00497816	-0.007479841	-0.007686609	0.001219149	-0.004463391	-0.001279317	0.000301864	-0.008591825	0.039210055	0.01593632	-0.007467601	-0.010225947	0.011270657	0.012137453	-0.006487393	0.015781024	0.046155226	-0.005840293	-0.009998417	0.005448738	-0.009901988	-0.007322065
ME38	-0.034905498	-0.032801929	-0.021242491	-0.023410689	0.000179232	0.055210403	0.029621552	-0.028662272	-0.027685512	-0.004789682	-0.025119274	-0.025796689	-0.01615044	-0.03386477	-0.035172727	-0.019098723	0.013017986	-0.014405876	-0.006779869	-0.004897646	-0.019943637	0.038094854	-0.007987552	-0.029540446	-0.008136788	-0.003107744	-0.032203292	-0.024935021	0.041441441	-0.027047473	0.026183861	0.049034655	-0.030269135	-0.019969741	0.007134671	0.037935287	-0.028462285	-0.013329835	0.029448919	-0.033909014	0.0196116	-0.016074769	0.003150621	0.026648293	-0.036257068	-0.005375915	0.002913022	-0.028352003	-0.043521396
ME39	-0.019131648	-0.006174905	-0.020545661	-0.017944035	0.019158085	0.007784248	-0.035310043	-0.010937337	-0.004990256	0.013579077	-0.005688728	-0.001409943	-0.01619315	-0.024153077	0.02779511	0.001142467	0.036285054	-0.00342293	0.028697967	-0.021482117	0.014171373	0.007693206	-0.014383641	-0.034500596	-0.008159326	-0.008657493	-0.009288317	0.020927885	0.014345419	-0.045113506	0.008796861	-0.006178584	-0.025214171	0.012309908	-0.019965316	-0.011517381	-0.004296598	-0.001253876	0.015047892	0.000232111	0.036709352	-0.009585565	-0.039477037	-0.006647826	0.022923308	0.034243239	-0.005019761	-0.020937073	-0.021614079
ME40	-0.017013316	-0.029293836	-0.008812488	-0.001455705	-0.010306153	0.058280744	0.094771628	-0.017942525	-0.016456607	-0.003405416	0.004068822	0.033215354	-0.013367209	-0.015877992	0.001288161	-0.012125456	-0.011797423	-0.008071117	-0.007070711	-0.015588495	-0.028857461	0.019733169	-0.012843945	-0.026429495	-0.006610776	0.023949261	-0.015067925	-0.010456341	-0.016536579	-0.00844514	-0.011563125	0.108853788	-0.015169943	-0.023626229	0.00803545	0.052673405	-0.013721542	-0.018702429	0.019970971	-0.014317389	0.002464265	0.010237628	0.020342531	-0.014708346	-0.02634759	-0.010535716	-0.012969465	-0.015841059	-0.024372671
ME41	0.016816513	0.022816255	0.013401522	0.008519163	-0.007825373	-0.045174943	0.016867926	-0.01607063	0.084283966	-0.025798293	0.010622836	0.039459287	0.067284831	-0.003069324	0.02420416	0.011065701	-0.031380093	-0.00599055	-0.019220234	-0.034648499	-0.006337857	-0.047300664	-0.028717219	-0.019482441	-0.004253716	0.016184021	-0.003749331	0.026448076	-0.013314345	0.020707255	0.004242229	-0.028969111	0.014988074	0.025283005	-0.007072517	-0.008908875	0.087755948	-0.029004529	-0.017748195	0.022175587	0.007820141	-0.042967521	0.016727592	0.011935918	-0.014926328	0.034832427	-0.035129418	0.019182113	0.034711077
ME42	-0.019587696	0.043279186	-0.001210149	0.016826994	-0.011503613	-0.014262205	0.028012911	-0.021937695	-0.011631487	0.014359485	0.050854261	-0.017987541	-0.008326239	-0.010856929	-5.94E-05	0.003731372	0.030618304	-0.014015295	-0.006347033	-0.011504028	-0.008175334	-0.009305957	-0.013046684	-0.012832555	0.000649823	-0.013016492	-0.002037145	-0.011163221	0.00239244	-0.019647518	0.00889222	0.070961714	-0.006499347	0.01507068	-0.016428653	-0.011544233	-0.012267885	0.027625945	0.008274783	-0.006912223	-0.011084346	-0.007480074	-0.012148009	-0.012833693	-0.012371648	-0.005431769	0.047420129	-0.020436325	-0.012347228
ME43	-0.00636566	-0.001757551	-0.011552831	-0.022057154	-0.014531264	-0.016886463	-0.051137689	0.006358858	-0.011472642	0.008484809	0.00413073	0.021362742	-0.005725511	-0.030662394	0.000257126	-0.003095072	-0.015489709	-0.009163948	-0.011858347	0.032644342	-0.005402037	-0.046602946	0.120086828	-0.004115164	0.001253011	0.00651283	0.001487985	-0.022954405	0.004022523	0.009253985	-0.017092442	0.003048001	-0.004580639	0.008746685	-0.018830456	-0.006216278	-0.007290638	0.00601818	-0.017596415	-0.003360733	-0.051080585	0.039373114	-0.006759797	-0.022497068	0.001673843	-0.004271082	-0.00941973	0.006723242	-0.006837751
ME44	-0.000761778	-0.003493271	-0.008904178	-0.014694723	0.00275282	-0.012189851	-0.035224276	-0.004525969	-0.019861673	0.005872897	-0.004184652	-0.012562507	0.006079898	0.00758229	0.070946969	-0.00029995	0.001439584	0.01514691	-0.000624599	0.053260647	-0.003395174	-0.024339468	0.103193727	-0.022988208	-0.020519549	-0.010218536	-0.012221765	-0.011172136	0.017954487	-0.012407641	-0.027268047	-0.000374861	-0.003623168	-0.003131024	-0.019840592	-0.016529872	-0.010438629	0.000603942	0.019319902	0.003820403	-0.03303797	0.008314726	-0.006357562	0.010017149	-0.012074829	-0.005131777	-0.003407475	-0.005267374	-0.00257897
ME45	0.01501141	0.006711029	-0.011662422	-0.004091427	0.016600433	0.011038725	-0.01361245	-0.000281169	0.008532375	0.029424809	-0.023028251	-0.019037686	0.00235037	-0.047546115	-0.013694508	0.020857823	0.040782017	0.023491173	0.029020302	-0.042011342	-0.021404737	-0.014498094	-0.021006469	-0.020594371	0.009983702	-0.017775392	0.004815424	-0.033398941	0.00283843	-0.040689551	0.018534463	-0.045820817	0.007459982	0.020002218	0.002123029	0.003090546	0.010012142	0.004523696	0.035208917	-0.000207452	-0.026296587	-0.021809076	-0.032877368	-0.018850944	0.026606402	0.053335604	-0.00175393	-0.018119934	-0.010270713
ME46	0.003820694	-0.063538809	0.005378719	-0.02435424	-0.050955453	0.000931646	-0.03612052	-0.005471466	-0.019606241	0.018031584	-0.046535632	0.007008411	-0.035867981	0.015017996	-0.042023282	-0.039815452	-0.031184755	0.016452656	-0.024424896	-0.001596612	0.013593973	0.012513626	0.030728941	0.03121937	0.022407197	0.001895673	0.003121464	-0.044827641	0.069419283	-0.008370304	0.004622281	0.067424141	-0.004052841	-0.034867349	-0.006489445	0.007671726	-0.002492452	-0.034684033	0.025703655	-0.009757063	0.0091859	0.03968755	0.064735317	0.012757922	-0.011569387	-0.004183416	-0.022247209	-0.001980886	-0.030306134
ME47	-0.005488252	-0.038975191	0.000983088	-0.010660672	0.008874175	0.053943949	0.047909351	-0.022027832	-0.021109912	0.007844351	-0.008751972	-0.006379811	-0.014895607	-0.000737363	0.009097592	-0.011356766	-0.004427992	0.005771832	-0.007262106	-0.005740036	-0.04070619	0.033999554	0.006350657	-0.026394907	-0.00289188	-0.032415484	-0.004454799	0.000814294	-0.014077785	-0.021582744	-0.003705648	0.213724452	-0.018307142	-0.022464554	0.007886335	-0.017759409	-0.007135924	-0.021577505	0.027226754	-0.017028638	0.011397527	0.021941947	0.027762947	-0.011456628	-0.004064456	-0.00119901	-0.013332998	-0.023825049	-0.021476966
ME48	-0.003446851	0.001192816	0.002211786	-0.013645936	-0.00039578	-0.008650151	0.018950408	-0.004863995	0.237284103	0.004257264	0.001258198	0.006164388	0.000257319	-0.007972031	-0.001134496	-0.01139517	0.004243751	-0.009488986	0.000279717	-0.013476294	-0.008055423	0.025013447	-0.006726579	-0.00849486	-0.00173678	0.000664858	-0.009961585	0.000604112	-0.00124536	0.006697102	-0.004663347	-0.003687849	-0.009124797	-0.008523163	0.017285739	0.001555176	-0.009557802	0.000397422	-0.001473245	-0.006291887	-0.012737947	-0.011191354	-0.010512158	0.003751947	-0.007013659	0.003194198	-0.010802661	0.005112342	0.003374559
[truncated: 1,329 more columns]
